# Supplementary material for: Authentication of Argan (Argania spinosa L.) Oil Using Novel DNA-Based Approaches: Detection of Olive and Soybean Oils as Potential Adulterants
Source: MDPI journal article supplement (doi:10.3390/foods11162498), 2022-08-18
Supplement: s1 [file s1]

## Supplementary material

**Table S1.** Results of PCR amplification targeting the ITS2, *matK* and *lectin* genes of argan, olive and soybean, respectively, and a universal eukaryotic DNA region of several relevant plant species for cross-reactivity testing.

| Common name   | Plant species                 | Qualitative PCR      |                     |                            |                     |
|---------------|-------------------------------|----------------------|---------------------|----------------------------|---------------------|
|               |                               | 18S rRNA<br>(EG-F/R) | ITS2<br>(ITS2A-F/R) | <i>matK</i><br>(matKO-F/R) | Lectin<br>(LE1/LE2) |
| Argan         | <i>Argania spinosa</i>        | +                    | +                   | -                          | -                   |
| Olive         | <i>Olea europaea</i>          | +                    | -                   | +                          | -                   |
| Soybean       | <i>Glycine max</i>            | +                    | -                   | -                          | +                   |
| Sunflower     | <i>Helianthus annuus</i>      | +                    | -                   | -                          | -                   |
| Rapeseed      | <i>Brassica napus</i>         | +                    | -                   | -                          | -                   |
| Maize         | <i>Zea mays</i>               | +                    | -                   | -                          | -                   |
| Almond        | <i>Prunus dulcis</i>          | +                    | -                   | -                          | -                   |
| Brazil nut    | <i>Bertholletia excelsa</i>   | +                    | -                   | -                          | -                   |
| Cashew nut    | <i>Anacardium occidentale</i> | +                    | -                   | -                          | -                   |
| Hazelnut      | <i>Corylus avellana</i>       | +                    | -                   | -                          | -                   |
| Macadamia nut | <i>Macadamia tetraphylla</i>  | +                    | -                   | -                          | -                   |
| Pine nut      | <i>Pinus pinea</i>            | +                    | -                   | -                          | -                   |
| Pistachio     | <i>Pistacia vera</i>          | +                    | -                   | -                          | -                   |
| Walnut        | <i>Juglans regia</i>          | +                    | -                   | -                          | -                   |
| Peanut        | <i>Arachis hypogaea</i>       | +                    | -                   | -                          | -                   |
| Oat           | <i>Avena sativa</i>           | +                    | -                   | -                          | -                   |
| Rye           | <i>Secale cereale</i>         | +                    | -                   | -                          | -                   |

**Table S2.** Commercial argan oil samples tested PCR amplification targeting the ITS2, *matK* and *lectin* genes of argan, olive and soybean, respectively.

| Sample | Application | Label                                                                   | Qualitative PCR     |                            |                     |
|--------|-------------|-------------------------------------------------------------------------|---------------------|----------------------------|---------------------|
|        |             |                                                                         | ITS2<br>(ITS2A-F/R) | <i>matK</i><br>(matKO-F/R) | Lectin<br>(LE1/LE2) |
| S1     | Cosmetic    | Huile d'Argane (non-torrieffée) (Produit Biologique, Marocco)           | +                   | -                          | -                   |
| S2     | Cosmetic    | Huile d'Argane (Visage, corps et cheveux) (Bio, Marocco)                | +                   | -                          | -                   |
| S3     | Cosmetic    | Huile d'Argane, beauté (100% naturel, Bio, Marocco)                     | +                   | -                          | -                   |
| S4     | Food        | Huile d'Argane Alimentaire (Produit Biologique, IGP, Marocco)           | +                   | -                          | -                   |
| S5     | Food        | Huile Vierge Argan Alimentaire (Torréfié Pressée à Froid, Bio, Marocco) | +                   | -                          | -                   |

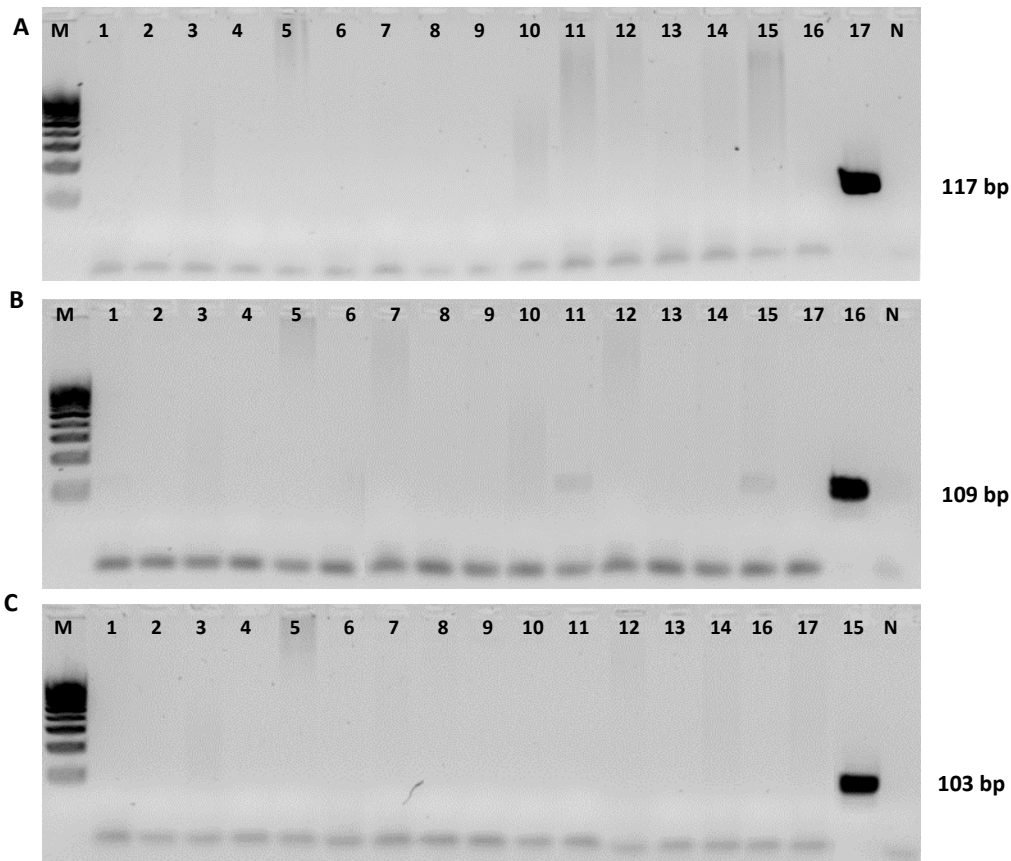

**Figure S1.** Agarose gel electrophoresis of PCR products targeting ITS, *matK* and *lectin* genes of *A. spinosa* (A), *O. europaea* (B) and *G. max* (C), respectively, for cross-reactivity assessment. Legend: Lane M, 100 bp molecular marker (Bioron, Ludwigshafen, Germany); lane 1, macadamia nut; lane 2, cashew nut; lane 3, peanut; lane 4, almond; lane 5, walnut; lane 6, hazelnut; lane 7, Brazil nut; lane 8, pine nut; lane 9, pistachio nut; lane 10, rapeseed; lane 11, sunflower; lane 12, oat; lane 13, rye; lane 14, maize; lane 15, soybean; lane 16, olive; lane 17, argan; lane N, negative control.

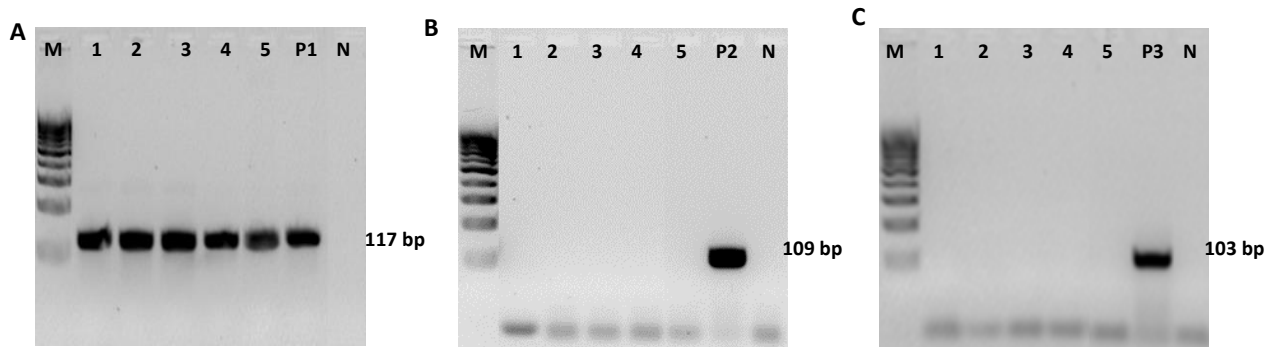

**Figure S2.** Agarose gel electrophoresis of PCR products targeting ITS, *matK* and *lectin* genes of *A. spinosa* (A), *O. europaea* (B) and *G. max* (C), respectively, in commercial samples of argan food or cosmetic oils. Legend: lane M, DNA 100 bp molecular marker (Bioron, Ludwigshafen, Germany); lanes 1-3, argan oil cosmetic grade S1, S2 and S3, respectively; lanes 4 and 5, argan oil food grade S4 and S5, respectively; lane P1, positive control for argan; lane P2, positive control for olive; lane P3, positive control for soybean; lane N, negative control.
